# Supplementary material for: Ultrafast Room Temperature Synthesis of Porous Polythiophene via Atmospheric Pressure Plasma Polymerization Technique and Its Application to NO2 Gas Sensors
Source: MDPI journal article supplement (doi:10.3390/polym13111783), 2021-05-28
Supplement: s1 [file s1]

*Supplementary Materials*

# Ultrafast Room Temperature Synthesis of Porous Polythiophene via Atmospheric Pressure Plasma Polymerization Technique and Its Application to NO<sub>2</sub> Gas Sensors

Choon-Sang Park <sup>1,†</sup>, Do Yeob Kim <sup>2,†</sup>, Eun Young Jung <sup>3</sup>, Hyo Jun Jang <sup>3</sup>, Gyu Tae Bae <sup>3</sup>, Jae Young Kim <sup>3</sup>,  
Bhum Jae Shin <sup>4</sup>, Hyung-Kun Lee <sup>2,\*</sup> and Heung-Sik Tae <sup>3,5,\*</sup>

<sup>1</sup> Department of Electronics and Computer Engineering, College of Engineering, Kansas State University, Manhattan, NY 66506, USA; purplepcs@ksu.edu

<sup>2</sup> ICT Creative Research Laboratory, Electronics & Telecommunications Research Institute, Daejeon 34129, Korea; nanodykim@etri.re.kr

<sup>3</sup> School of Electronic and Electrical Engineering, College of IT Engineering, Kyungpook National University, Daegu 41566, Korea; eyjung@knu.ac.kr (E.Y.J.); ; bs00201@knu.ac.kr (H.J.J.); doctor047@knu.ac.kr (G.T.B.); jyk@knu.ac.kr (J.Y.K.)

<sup>4</sup> Department of Electronics Engineering, Sejong University, Seoul 05006, Korea; hahusbj@sejong.ac.kr

<sup>5</sup> School of Electronics Engineering, College of IT Engineering, Kyungpook National University, Daegu 41566, Korea

\* Correspondence: hkleee@etri.re.kr (H.-K.L.); hstae@ee.knu.ac.kr (H.-S.T.); Tel.: +82-53-950-6563 (H.-S.T.)

† These authors contributed equally to this work.

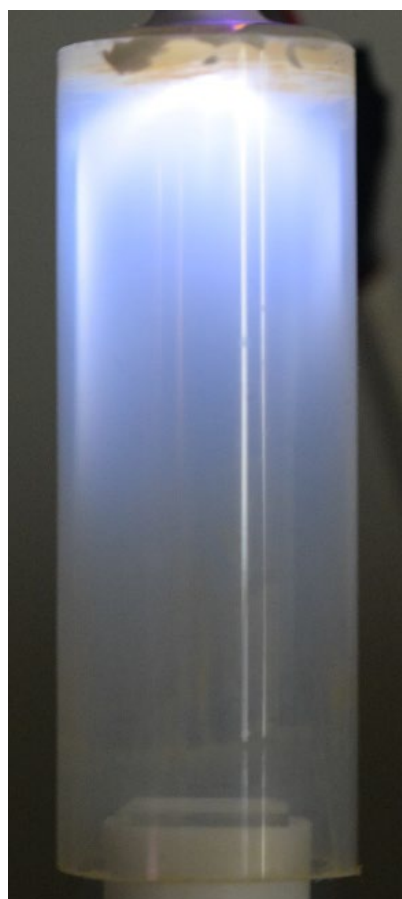

**Figure S1.** A photograph of the plasma produced with supply of vaporized thiophene monomer.

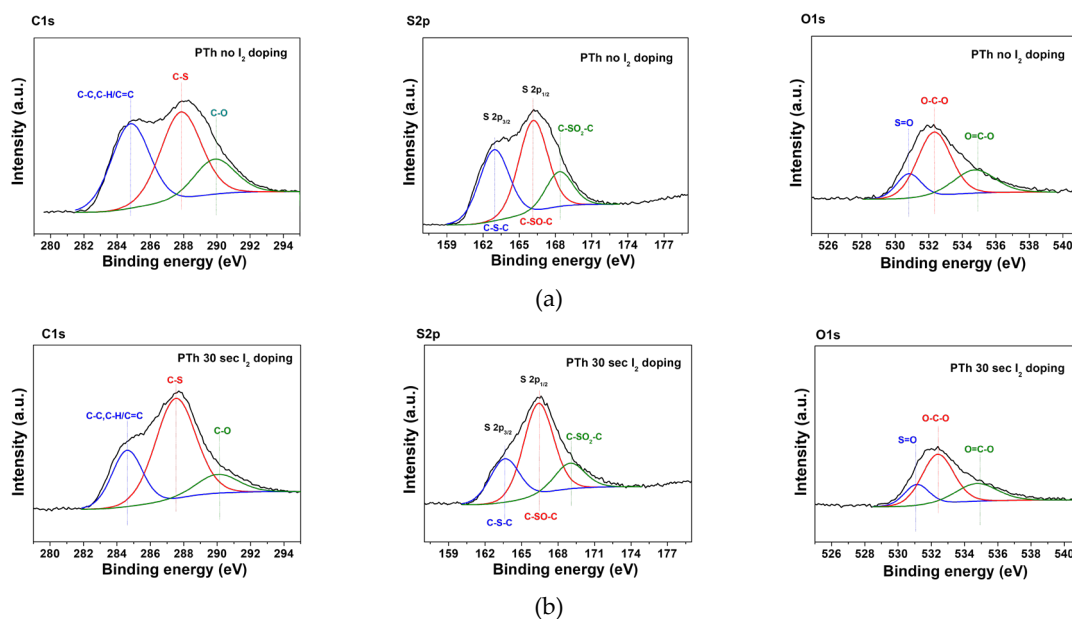

**Figure S2.** The detailed high-resolution with deconvolutions of C 1s, S 2p, and O 1s spectra in Figure 3 of the plasma polymerized thiophene films (a) without and (b) I<sub>2</sub> doping.

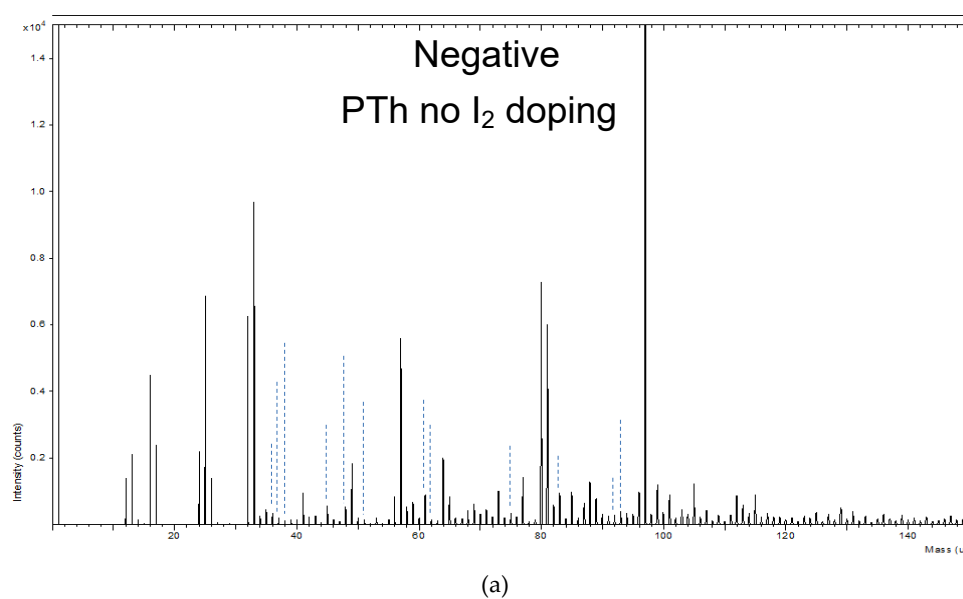

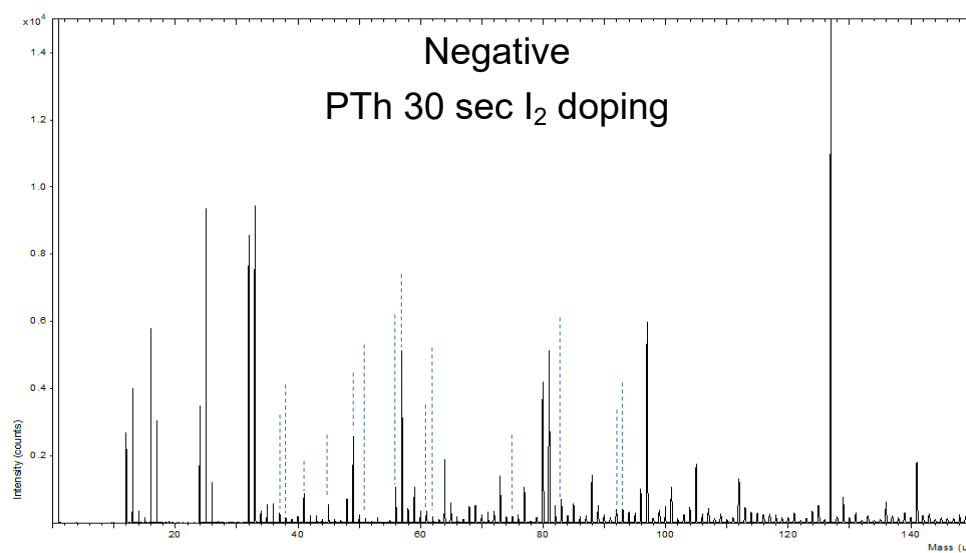

(b)

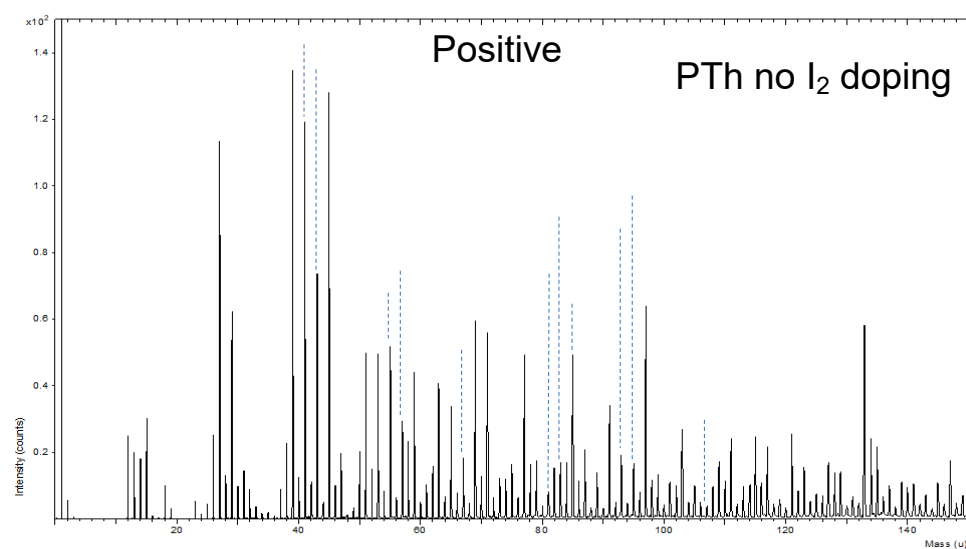

(c)

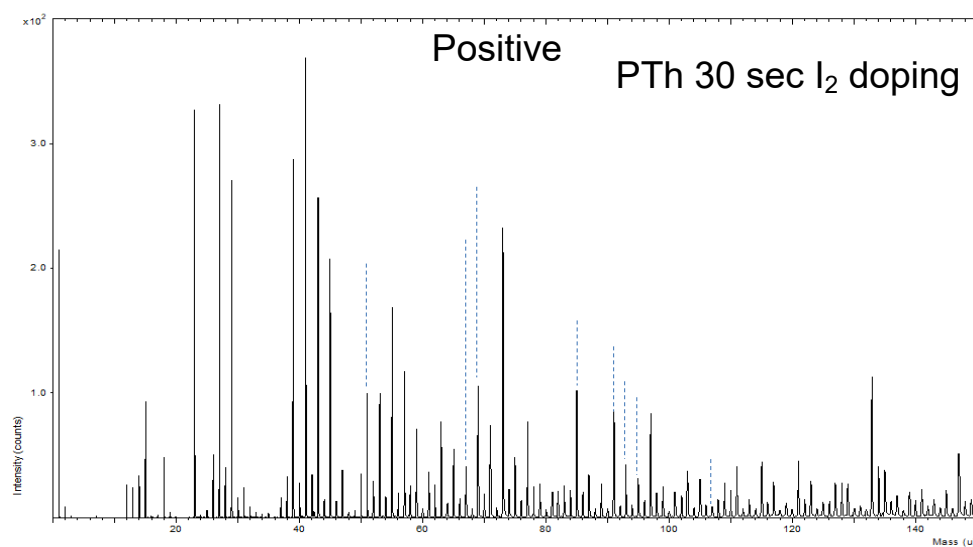

(d)

**Figure S3.** Negative-ion spectra (0-150 amu) and positive-ion spectra (0-150 amu) of ToF-SIMS on surface of the plasma polymerized thiophene films without and with I<sub>2</sub> doping. (a) Negative-ion without I<sub>2</sub> doping. (b) Negative-ion with I<sub>2</sub> doping. (c) Positive-ion without I<sub>2</sub> doping. (d) Positive-ion with I<sub>2</sub> doping.

**Table S1.** Selected peaks and their assignments observed in negative-ion time of flight secondary ion mass spectrometry (ToF-SIMS) spectra of the PTh films.

| Negative ion mass spectrum | Possible ion fragment/Possible structure         |
|----------------------------|--------------------------------------------------|
| <i>m/z</i>                 |                                                  |
| 1                          | H <sup>-</sup>                                   |
| 12                         | C <sup>-</sup>                                   |
| 13                         | CH <sup>-</sup>                                  |
| 15                         | NH <sup>-</sup>                                  |
| 16                         | O <sup>-</sup>                                   |
| 17                         | OH <sup>-</sup>                                  |
| 24                         | C <sub>2</sub> <sup>-</sup>                      |
| 25                         | C <sub>2</sub> H <sup>-</sup>                    |
| 32                         | S <sup>-</sup>                                   |
| 33                         | HS <sup>-</sup>                                  |
| 36                         | C <sub>3</sub> <sup>-</sup>                      |
| 37                         | C <sub>3</sub> H <sup>-</sup>                    |
| 38                         | C <sub>3</sub> H <sub>2</sub> <sup>-</sup>       |
| 41                         | C <sub>2</sub> HO <sup>-</sup>                   |
| 44                         | CS <sup>-</sup>                                  |
| 45                         | CHO <sub>2</sub> <sup>-</sup> , CHS <sup>-</sup> |
| 48                         | C <sub>4</sub> <sup>-</sup> , SO <sup>-</sup>    |
| 49                         | C <sub>4</sub> H <sup>-</sup>                    |
| 51                         | C <sub>4</sub> H <sub>3</sub> <sup>-</sup>       |
| 56                         | C <sub>2</sub> S <sup>-</sup>                    |
| 57                         | C <sub>2</sub> HS <sup>-</sup>                   |
| 61                         | C <sub>5</sub> H <sup>-</sup>                    |
| 62                         | C <sub>5</sub> H <sub>2</sub> <sup>-</sup>       |
| 64                         | SO <sub>2</sub> <sup>-</sup>                     |

|     |                                              |
|-----|----------------------------------------------|
| 73  | C <sub>6</sub> H <sup>+</sup>                |
| 75  | C <sub>6</sub> H <sub>3</sub> <sup>+</sup>   |
| 80  | SO <sub>3</sub> <sup>+</sup>                 |
| 81  | C <sub>4</sub> HS <sup>+</sup>               |
| 83  | C <sub>4</sub> H <sub>3</sub> S <sup>+</sup> |
| 92  | C <sub>5</sub> S <sup>+</sup>                |
| 93  | C <sub>5</sub> HS <sup>+</sup>               |
| 97  | C <sub>8</sub> H <sup>+</sup>                |
| 105 | C <sub>6</sub> HS <sup>+</sup>               |
| 129 | C <sub>8</sub> HS <sup>+</sup>               |

**Table S2.** Selected peaks and their assignments observed in positive-ion ToF-SIMS spectra of the PTh films.

| Positive ion mass spectrum | Possible ion fragment/Possible structure                  |
|----------------------------|-----------------------------------------------------------|
| <i>m/z</i>                 |                                                           |
| 1                          | H <sup>+</sup>                                            |
| 12                         | C <sup>+</sup>                                            |
| 15                         | CH <sub>3</sub> <sup>+</sup>                              |
| 27                         | C <sub>2</sub> H <sub>3</sub> <sup>+</sup>                |
| 29                         | C <sub>2</sub> H <sub>5</sub> <sup>+</sup>                |
| 39                         | C <sub>3</sub> H <sub>3</sub> <sup>+</sup>                |
| 41                         | C <sub>3</sub> H <sub>5</sub> <sup>+</sup>                |
| 43                         | C <sub>3</sub> H <sub>7</sub> <sup>+</sup>                |
| 51                         | C <sub>4</sub> H <sub>3</sub> <sup>+</sup>                |
| 55                         | C <sub>4</sub> H <sub>7</sub> <sup>+</sup>                |
| 57                         | C <sub>4</sub> H <sub>9</sub> <sup>+</sup>                |
| 67                         | C <sub>5</sub> H <sub>7</sub> <sup>+</sup>                |
| 69                         | C <sub>5</sub> H <sub>9</sub> <sup>+</sup>                |
| 77                         | C <sub>6</sub> H <sub>5</sub> <sup>+</sup>                |
| 81                         | C <sub>6</sub> H <sub>9</sub> <sup>+</sup>                |
| 83                         | C <sub>5</sub> H <sub>7</sub> O <sup>+</sup>              |
| 85                         | C <sub>4</sub> H <sub>5</sub> O <sub>2</sub> <sup>+</sup> |
| 91                         | C <sub>7</sub> H <sub>7</sub> <sup>+</sup>                |

|     |               |
|-----|---------------|
| 93  | $C_7H_9^+$    |
| 95  | $C_7H_{11}^+$ |
| 107 | $C_7H_7O^+$   |

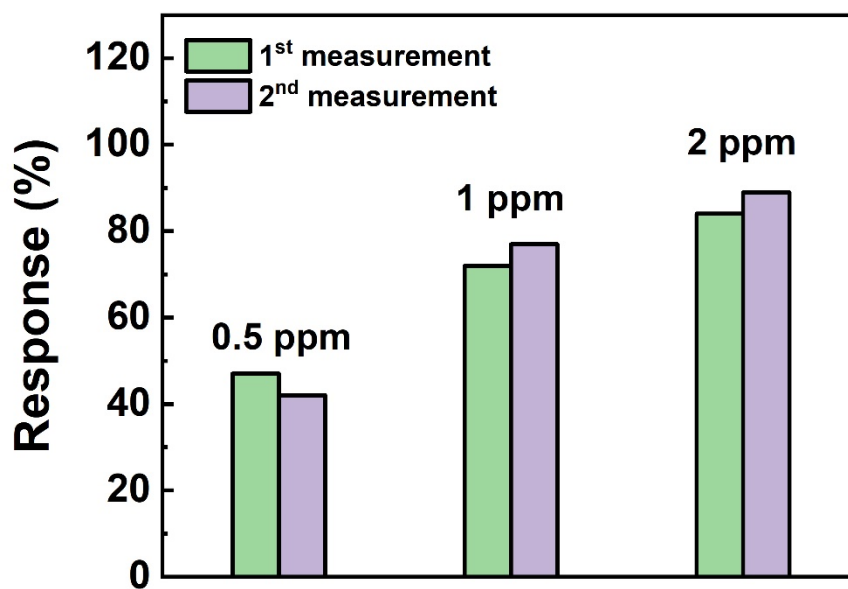

Figure S4. Repeatability of the sensors based on I<sub>2</sub>-doped PTh films at different NO<sub>2</sub> concentrations.
